# Supplementary material for: Mechanism of groundwater inrush hazard caused by solution mining in multilayer rock salt mine area: a case study in Tongbai County, China
Source: Copernicus journal article supplement (doi:10.5194/nhess-2017-118), 2017-05-05
Supplement: Supplementary file [file nhess-2017-118-RC2-supplement.pdf]

**Comment of Paolo Forti on the paper : "Mechanism of groundwater intrush hazard....." vBy  
Bin Zeng et al.**

The paper is interesting supplying new original data on a mechanism of pollution related to salt mines.

But the paper cannot be printed in its actual form needing by my opinion major revision, for the following main reasons:

- 1- It is written in a very poor English which often avoid the possibility to understand what the Authors are describing. The must be rewritten by a mother language
- 2- The lithological column of fig. 3 (wrongly addressed as 2 along the paper) is not sufficiently explicative. It lacks of the definition of glutenite ( it is not a general accepted geological term), of the location with a specific symbol of the gypsum layers, of specific symbols for the different exploited minerals etc..
- 3- In the sketch of fig. 4 it is not clear (not explained in text) how the groundwater flow directions have been defined.
- 4- The sketch of fig. 5 is not clear: colors of the different minerals can be confused; the development of the geological fractures are not clearly explained (nor in the text) and the contribution of the gypsum dissolution is poorly explained (in text it is sated that it is an aquiclude but this is not true: it is well known that gypsum if fractured as surely it becomes easily karstified ( by an hot under pressure water....) and therefore it becomes a permeable rock...
- 5- The reference list is not in alphabetical order and therefore it is impossible to be checked.

Only when these questions will be satisfactory answered it would be possible to give a definitive evaluation of the paper

Paolo Forti
